# Supplementary material for: Robots in Eldercare: How Does a Real-World Interaction with the Machine Influence the Perceptions of Older People?
Source: MDPI journal article supplement (doi:10.3390/s22051717), 2022-02-22
Supplement: s1 [file s1]

**Table S1.** The determinants of participants' opinion changes: percentages of participants whose opinions worsened after interaction with the robot

| Area of the questionnaire                                                                                                                                 | <u>Age:</u><br><80 years<br>vs. ≥80<br>years | <u>Gender:</u><br>females<br>vs. males | <u>Education:</u><br>primary and<br>below vs.<br>above primary | <u>Ease of use<br/>of technolo-<br/>gical devices:</u><br>1-3 vs. 4-5* | <u>Self-<br/>perception<br/>of health:</u><br>1-3 vs. 4-5* | <u>Self-<br/>perception<br/>of fitness:</u><br>1-3 vs. 4-5* |
|-----------------------------------------------------------------------------------------------------------------------------------------------------------|----------------------------------------------|----------------------------------------|----------------------------------------------------------------|------------------------------------------------------------------------|------------------------------------------------------------|-------------------------------------------------------------|
| <b>A: INTERACTION WITH THE ROBOT AND TECHNICAL ISSUES</b>                                                                                                 |                                              |                                        |                                                                |                                                                        |                                                            |                                                             |
| A1 The robot should be a companion of the elderly person                                                                                                  | 9.2% vs.<br>16.7%                            | 17.2% vs.<br>6.1%                      | 10.6% vs.<br>13.6%                                             | 9.5% vs.<br>16.3%                                                      | 11.8% vs.<br>13.5%                                         | 14.1% vs.<br>9.5%                                           |
| A2 The robot should be an assistant of the elderly person                                                                                                 | 4.6% vs.<br>16.7%                            | 12.5% vs.<br>6.1%                      | 10.6% vs.<br>9.1%                                              | 11.1% vs.<br>8.2%                                                      | 9.2% vs.<br>10.8%                                          | 11.3% vs.<br>7.1%                                           |
| A3 The robot should be a useful device of the elderly person (something to be used when needed, with no other interaction)                                | 7.7% vs.<br>6.3%                             | 7.8% vs.<br>6.1%                       | 4.3% vs.<br>9.1%                                               | 3.2% vs.<br>12.2%                                                      | 10.5% vs.<br>0.0%                                          | 7.0% vs.<br>7.1%                                            |
| A4 The elderly are prepared to interact with a robot                                                                                                      | 20.0% vs.<br>16.7%                           | 14.1% vs.<br>24.5%                     | 12.8% vs.<br>22.7%                                             | 14.3% vs.<br>24.5%                                                     | 19.7% vs.<br>16.2%                                         | 16.9% vs.<br>21.4%                                          |
| A5 The elderly are able to manage with the robot                                                                                                          | 29.2% vs.<br>31.3%                           | 26.6% vs.<br>34.7%                     | 27.7% vs.<br>31.8                                              | 25.4% vs.<br>36.7%                                                     | 30.3% vs.<br>29.7%                                         | 29.6% vs.<br>31.0%                                          |
| A6 The elderly want to increase their knowledge about the robots to be able to operate them                                                               | 26.2% vs.<br>20.8%                           | 23.4% vs.<br>24.5%                     | 19.2% vs.<br>27.3%                                             | 17.5% vs.<br>32.7%                                                     | 23.7% vs.<br>24.3%                                         | 29.6% vs.<br>14.3%                                          |
| A7 The robot should instruct the elderly person what to do in case of problems with its operation                                                         | 9.2% vs.<br>16.7%                            | 10.9% vs.<br>14.3%                     | 10.6% vs.<br>13.6%                                             | 7.9% vs.<br>16.3%                                                      | 10.5% vs.<br>16.2%                                         | 9.9% vs.<br>16.7%                                           |
| A8 The robot should be customizable (adjusted to individual user preferences and needs)                                                                   | 6.2% vs.<br>6.3%                             | 7.8% vs.<br>4.1%                       | 4.3% vs.<br>7.6%                                               | 6.4% vs.<br>6.1%                                                       | 6.6% vs.<br>5.4%                                           | 4.2% vs.<br>9.5%                                            |
| A9 The elderly should be able to choose the functions of the robot they want to use and disable other ones                                                | 18.5% vs.<br>8.3%                            | 10.9% vs.<br>18.4%                     | 12.8% vs.<br>15.2%                                             | 15.9% vs.<br>12.2%                                                     | 18.4% vs.<br>5.4%                                          | 18.3% vs.<br>7.1%                                           |
| A10 If the robot has been switched off by the owner, it should reactivate automatically (after a specific period) so that it is not forgotten in off mode | 13.9% vs.<br>12.5%                           | 15.6% vs.<br>10.2%                     | 6.4% vs.<br>18.2%                                              | 14.3% vs.<br>12.2%                                                     | 13.2% vs.<br>13.5%                                         | 12.7% vs.<br>14.3%                                          |
| <b>B: ASSISTIVE ROLE OF THE ROBOT</b>                                                                                                                     |                                              |                                        |                                                                |                                                                        |                                                            |                                                             |
| B1 The robot should increase the safety of the elderly home: e.g. locking doors, detecting leaking gas etc.                                               | 3.1% vs.<br>6.3%                             | 6.3% vs.<br>2.0%                       | 6.4% vs.<br>3.0%                                               | 3.2% vs.<br>6.1%                                                       | 4.0% vs.<br>5.4%                                           | 4.2% vs.<br>4.8%                                            |
| B2 The robot should help the elderly to preserve their memory function, e.g. by playing memory games with them                                            | <b>6.2% vs.<br/>18.8%</b><br><i>p</i> <0.05  | 14.1% vs.<br>8.2%                      | 4.3% vs.<br>16.7%                                              | 16.7% vs.<br>14.3%                                                     | 11.8% vs.<br>10.8%                                         | 9.9% vs.<br>14.3%                                           |
| B3 The robot should encourage and guide the elderly to perform physical exercises                                                                         | 10.8% vs.<br>14.6%                           | 14.1% vs.<br>10.2%                     | 4.3% vs.<br>16.7%                                              | 16.7% vs.<br>12.2%                                                     | 14.5% vs.<br>8.1%                                          | 12.7% vs.<br>11.9%                                          |
| B4 The robot should provide advice about a healthy diet                                                                                                   | 15.4% vs.<br>16.7%                           | 15.6% vs.<br>16.3%                     | 17.0% vs.<br>15.2%                                             | <b>22.2% vs.<br/>8.2%</b><br><i>p</i> <0.05                            | 18.4% vs.<br>10.8%                                         | 14.1% vs.<br>19.1%                                          |
| B5 The robot should monitor the environment (temperature. humidity) and suggest air conditioning adjustment or windows opening                            | 6.2% vs.<br>12.5%                            | 10.9% vs.<br>6.1%                      | 8.5% vs.<br>9.1%                                               | 9.1% vs.<br>8.2%                                                       | 10.5% vs.<br>5.4%                                          | 12.7% vs.<br>2.4%                                           |
| B6 The robot should measure physiological parameters (blood pressure. heart rate. body temperature) of the elderly person                                 | 16.9% vs.<br>10.4%                           | 9.4% vs.<br>20.4%                      | 14.9% vs.<br>13.6%                                             | 13.6% vs.<br>10.2%                                                     | 14.5% vs.<br>13.5%                                         | 14.1% vs.<br>14.3%                                          |
| B7 The robot should monitor the amount of food and fluid intake of the owner                                                                              | 20.0% vs.<br>22.9%                           | 18.8% vs.<br>24.5%                     | 23.4% vs.<br>19.7%                                             | 19.7% vs.<br>18.4%                                                     | 23.7% vs.<br>16.2%                                         | 21.1% vs.<br>21.4%                                          |
| B8 The robot should remind the elderly about appointments                                                                                                 | 12.3% vs.<br>8.3%                            | 7.8% vs.<br>14.3%                      | 17.0% vs.<br>6.1%                                              | 6.4% vs.<br>16.3%                                                      | 13.2% vs.<br>5.4%                                          | 8.5% vs.<br>14.3%                                           |
| B9 The robot should remind the elderly about medication                                                                                                   | 7.7% vs.<br>4.2%                             | 3.1% vs.<br>10.2%                      | 6.4% vs.<br>6.1%                                               | 6.1% vs.<br>12.2%                                                      | 6.6% vs.<br>5.4%                                           | 7.0% vs.<br>4.8%                                            |
| B10 The robot should remind about meals times. drinks                                                                                                     | 20.0% vs.<br>16.7%                           | 18.8% vs.<br>18.4%                     | 10.6% vs.<br>24.2%                                             | 24.2% vs.<br>22.5%                                                     | 18.4% vs.<br>18.9%                                         | 18.3% vs.<br>19.1%                                          |

|                                                                                                                             |                    |                                             |                    |                    |                    |                    |
|-----------------------------------------------------------------------------------------------------------------------------|--------------------|---------------------------------------------|--------------------|--------------------|--------------------|--------------------|
| B11 The robot should observe the behaviour of the elderly person to detect falls or changes due to illness                  | 7.7% vs.<br>6.3%   | 7.8% vs.<br>6.1%                            | 10.6% vs.<br>4.6%  | 4.6% vs.<br>6.1%   | 7.9% vs.<br>5.4%   | 5.6% vs.<br>9.5%   |
| B12 The robot should call the centre in case of emergency                                                                   | 7.7% vs.<br>2.1%   | 1.6% vs.<br>10.2%                           | 6.4% vs.<br>4.6%   | 4.6% vs.<br>8.2%   | 6.6% vs.<br>2.7%   | 7.0% vs.<br>2.4%   |
| B13 The robot should help the owner to find lost objects (e.g. glasses, keys)                                               | 4.6% vs.<br>4.2%   | 7.8% vs.<br>0.0%                            | 2.1% vs.<br>6.1%   | 3.2% vs.<br>6.1%   | 5.3% vs.<br>2.7%   | 4.2% vs.<br>4.8%   |
| <b>C: SOCIAL ASPECTS OF USING THE ROBOT</b>                                                                                 |                    |                                             |                    |                    |                    |                    |
| C1 The robot could decrease the sense of loneliness and improve the mood of the elderly person                              | 10.8% vs.<br>16.7% | 15.6% vs.<br>10.2%                          | 8.5% vs.<br>16.7%  | 9.5% vs.<br>18.4%  | 14.5% vs.<br>10.8% | 15.5% vs.<br>9.5%  |
| C2 The robot could encourage the elderly to enhance their contacts with friends                                             | 7.7% vs.<br>18.8%  | 14.1% vs.<br>10.2%                          | 6.4% vs.<br>16.7%  | 11.1% vs.<br>14.3% | 11.8% vs.<br>13.5% | 12.7% vs.<br>11.9% |
| C3 The robot should initiate contacts with others (calling friends, initiating skype conversations)                         | 13.9% vs.<br>18.8% | 18.8% vs.<br>12.2%                          | 10.6% vs.<br>19.7% | 14.3% vs.<br>18.4% | 17.1% vs.<br>13.5% | 18.3% vs.<br>11.9% |
| C4 The robot should have entertainment functions (e.g. gaming partner, reading aloud or playing music function)             | 10.8% vs.<br>14.6% | 12.5% vs.<br>12.2%                          | 10.6% vs.<br>13.6% | 9.5% vs.<br>16.3%  | 14.5% vs.<br>8.1%  | 14.1% vs.<br>9.5%  |
| C5 The robot should detect the owner's mood (facial expression)                                                             | 20.0% vs.<br>14.6% | 18.8% vs.<br>16.3%                          | 19.2% vs.<br>16.7% | 17.5% vs.<br>18.4% | 22.4% vs.<br>8.1%  | 19.7% vs.<br>14.3% |
| C6 The robot should accompany the owner in everyday activities (watching TV, preparing meals)                               | 23.1% vs.<br>25.0% | 29.7% vs.<br>16.3%                          | 21.3% vs.<br>25.8% | 27.0% vs.<br>20.4% | 26.3% vs.<br>18.9% | 23.9% vs.<br>23.8% |
| <b>D: ETHICAL ISSUES</b>                                                                                                    |                    |                                             |                    |                    |                    |                    |
| D1 The elderly person should have control over the robot                                                                    | 18.5% vs.<br>20.8% | 18.8% vs.<br>20.4%                          | 17.0% vs.<br>21.2% | 17.5% vs.<br>22.5% | 23.7% vs.<br>10.8% | 19.7% vs.<br>19.1% |
| D2 The elderly person should be able to send the robot to its place/docking station and keep it staying there               | 21.5% vs.<br>12.5% | 12.5% vs.<br>24.5%                          | 21.3% vs.<br>15.2% | 19.1% vs.<br>16.3% | 17.1% vs.<br>18.9% | 18.3% vs.<br>16.7% |
| D3 It is acceptable that the robot informs a family member or caregiver about the older person's behaviour/health problems  | 7.7% vs.<br>8.3%   | 6.3% vs.<br>10.2%                           | 6.4% vs.<br>9.1%   | 9.5% vs.<br>6.1%   | 10.5% vs.<br>2.7%  | 9.9% vs.<br>4.8%   |
| D4 The elderly person should be able to switch off the robot in specific situations (friends' visits, privacy reasons etc.) | 13.9% vs.<br>16.7% | 10.9% vs.<br>20.4%                          | 12.8% vs.<br>16.7% | 14.3% vs.<br>16.3% | 14.5% vs.<br>16.2% | 16.9% vs.<br>11.9% |
| D5 It is acceptable that the robot will have much information about the user (social, medical, others)                      | 18.5% vs.<br>8.3%  | <b>7.8% vs.<br/>22.5%</b><br><i>p</i> <0.05 | 8.5% vs.<br>18.2%  | 14.3% vs.<br>14.3% | 18.4% vs.<br>5.4%  | 12.7% vs.<br>16.7% |

\* *Ease of use of technological devices, Self-perception of health and Self-perception of fitness* were rated on a 5-point scale: from 1 (worst) via 3 (neutral) to 5 (best).

**Table S2.** Percentages of participants whose opinions worsened after interaction with the robot in relation to the scores of Mini Mental State Examination (MMSE) and Barthel Index

| Area of the questionnaire                                                                                                                                 | MMSE:<br>15-19 points<br>vs. ≥20points | Barthel Index:<br><80 points vs.<br>≥85 points |
|-----------------------------------------------------------------------------------------------------------------------------------------------------------|----------------------------------------|------------------------------------------------|
| <b>A: INTERACTION WITH THE ROBOT AND TECHNICAL ISSUES</b>                                                                                                 |                                        |                                                |
| A1 The robot should be a companion of the elderly person                                                                                                  | 18.2% vs.<br>10.3%                     | 13.3% vs.<br>10.7%                             |
| A2 The robot should be an assistant of the elderly person                                                                                                 | 18.2% vs.<br>7.7%                      | 8.9% vs.<br>10.7%                              |
| A3 The robot should be a useful device of the elderly person (something to be used when needed, with no other interaction)                                | 4.6% vs.<br>7.7%                       | 2.2% vs.<br>10.7%                              |
| A4 The elderly are prepared to interact with a robot                                                                                                      | 18.2% vs.<br>18.0%                     | 17.8% vs.<br>17.9%                             |
| A5 The elderly are able to manage with the robot                                                                                                          | 40.9% vs.<br>25.6%                     | 35.6% vs.<br>25.0%                             |
| A6 The elderly want to increase their knowledge about the robots to be able to operate them                                                               | 22.7%vs.<br>24.4%                      | 24.4% vs.<br>23.2%                             |
| A7 The robot should instruct the elderly person what to do in case of problems with its operation                                                         | 0.0% vs.<br>14.1%                      | 11.1% vs.<br>12.5%                             |
| A8 The robot should be customizable (adjusted to individual user preferences and needs)                                                                   | 4.6% vs.<br>6.4%                       | 6.7% vs.<br>5.4%                               |
| A9 The elderly should be able to choose the functions of the robot they want to use and disable other ones                                                | 0.0% vs.<br>14.1%                      | 13.3% vs.<br>8.9%                              |
| A10 If the robot has been switched off by the owner, it should reactivate automatically (after a specific period) so that it is not forgotten in off mode | 4.6% vs.<br>16.7%                      | 13.3% vs.<br>14.3%                             |
| <b>B: ASSISTIVE ROLE OF THE ROBOT</b>                                                                                                                     |                                        |                                                |
| B1 The robot should increase the safety of the elderly home: e.g. locking doors, detecting leaking gas etc.                                               | 4.6% vs.<br>3.9%                       | 4.4% vs.<br>3.6%                               |
| B2 The robot should help the elderly to preserve their memory function, e.g. by playing memory games with them                                            | 13.6% vs.<br>9.0%                      | <b>2.2% vs.<br/>16.1%</b><br><i>p&lt;0.05</i>  |
| B3 The robot should encourage and guide the elderly to perform physical exercises                                                                         | 18.2% vs.<br>9.0%                      | 6.7% vs.<br>16.1%                              |
| B4 The robot should provide advice about a healthy diet                                                                                                   | 18.2% vs.<br>15.4%                     | 8.9% vs.<br>21.4%                              |
| B5 The robot should monitor the environment (temperature. humidity) and suggest air conditioning adjustment or windows opening                            | 13.6% vs.<br>6.4%                      | 4.4% vs.<br>10.7%                              |
| B6 The robot should measure physiological parameters (blood pressure. heart rate. body temperature) of the elderly person                                 | 18.2% vs.<br>14.1%                     | 13.3% vs.<br>16.1%                             |
| B7 The robot should monitor the amount of food and fluid intake of the owner                                                                              | 22.7% vs.<br>23.1%                     | 20.0% vs.<br>25.0%                             |
| B8 The robot should remind the elderly about appointments                                                                                                 | 18.2% vs.<br>10.3%                     | 8.9% vs.<br>14.3%                              |
| B9 The robot should remind the elderly about medication                                                                                                   | 4.6% vs.<br>7.7%                       | 4.4% vs.<br>8.9%                               |
| B10 The robot should remind about meals times. drinks                                                                                                     | 22.7% vs.<br>19.2%                     | 15.6% vs.<br>23.2%                             |
| B11 The robot should observe the behaviour of the elderly person to detect falls or changes due to illness                                                | 13.6% vs.<br>5.1%                      | 8.9% vs.<br>5.4%                               |
| B12 The robot should call the centre in case of emergency                                                                                                 | 4.6% vs.<br>5.1%                       | 6.7% vs.<br>3.6%                               |
| B13 The robot should help the owner to find lost objects (e.g. glasses, keys)                                                                             | 0.0% vs.<br>5.1%                       | 4.4% vs.<br>3.6%                               |

| <b>C: SOCIAL ASPECTS OF USING THE ROBOT</b>                                                                                 |                    |                    |
|-----------------------------------------------------------------------------------------------------------------------------|--------------------|--------------------|
| C1 The robot could decrease the sense of loneliness and improve the mood of the elderly person                              | 13.6% vs.<br>11.5% | 11.1% vs.<br>12.5% |
| C2 The robot could encourage the elderly to enhance their contacts with friends                                             | 13.6% vs.<br>12.8% | 11.1% vs.<br>16.1% |
| C3 The robot should initiate contacts with others (calling friends, initiating skype conversations)                         | 18.2% vs.<br>14.1% | 11.1% vs.<br>17.9% |
| C4 The robot should have entertainment functions (e.g. gaming partner, reading aloud or playing music function)             | 13.6% vs.<br>11.5% | 8.9% vs.<br>14.3%  |
| C5 The robot should detect the owner's mood (facial expression)                                                             | 18.2% vs.<br>18.0% | 17.8% vs.<br>17.9% |
| C6 The robot should accompany the owner in everyday activities (watching TV, preparing meals)                               | 9.1% vs.<br>25.6%  | 17.8% vs.<br>25.0% |
| <b>D: ETHICAL ISSUES</b>                                                                                                    |                    |                    |
| D1 The elderly person should have control over the robot                                                                    | 22.7% vs.<br>14.1% | 17.8% vs.<br>16.1% |
| D2 The elderly person should be able to send the robot to its place/docking station and keep it staying there               | 27.3% vs.<br>14.1% | 13.3% vs.<br>19.6% |
| D3 It is acceptable that the robot informs a family member or caregiver about the older person's behaviour/health problems  | 4.6% vs.<br>9.0%   | 15.6% vs.<br>3.6%  |
| D4 The elderly person should be able to switch off the robot in specific situations (friends' visits, privacy reasons etc.) | 22.7% vs.<br>12.8% | 15.6% vs.<br>14.3% |
| D5 It is acceptable that the robot will have much information about the user (social, medical, others)                      | 18.2% vs.<br>14.1% | 11.1% vs.<br>19.6% |
